# Supplementary material for: Transcriptome Analysis Revealed the Dynamic and Rapid Transcriptional Reprogramming Involved in Cold Stress and Related Core Genes in the Rice Seedling Stage
Source: MDPI journal article supplement (doi:10.3390/ijms24031914), 2023-01-18
Supplement: s1 [file s1]

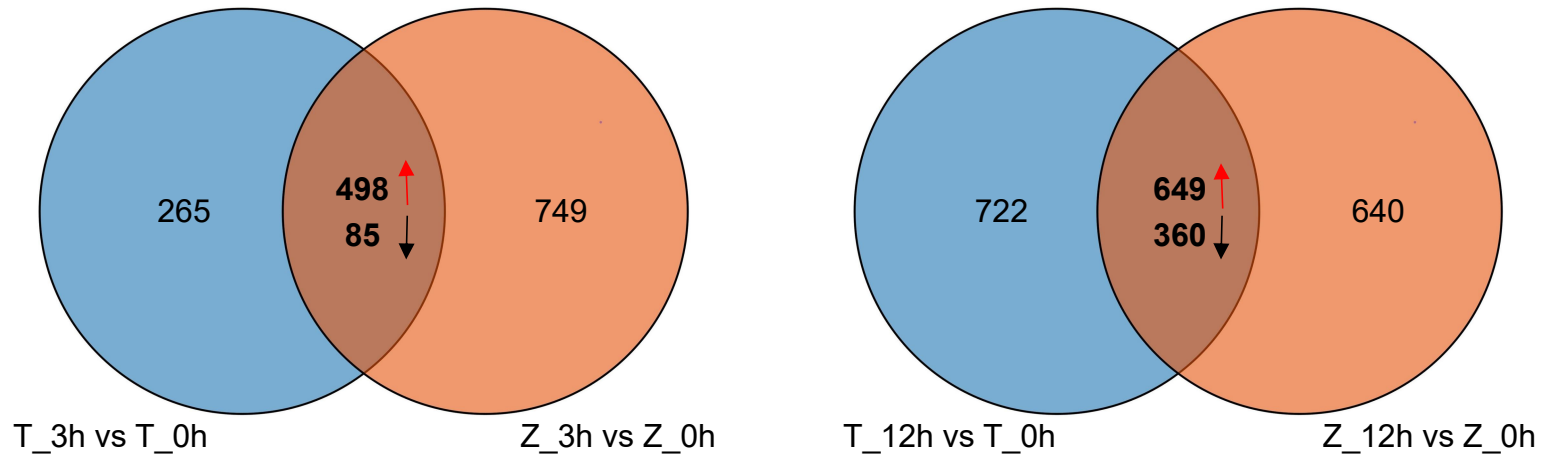

**Figure S1.** Venn diagram of DEGs induced by cold stress in Towada and ZL31 at the two time points compared with 0 h cold treatment. Up- and downregulated DEGs are indicated by upward- and downward-pointing arrows, respectively.

**Table S1.** Putative *cis*-regulatory elements of *OsWRKY24* identified in variant regions of the Towada and ZL31 promoters.

| Variant region (Towada) | Putative <i>cis</i> -element ID | Putative function                                                           |
|-------------------------|---------------------------------|-----------------------------------------------------------------------------|
| -1139 to -1136 bp       | GTGA motif                      | Modulate expression of the tobacco late pollen gene                         |
| -572 to -567 bp         | AMYBOX2                         | Conserved sequence found in 5' upstream region of <i>alpha-amylase</i> gene |
|                         | MYB                             | Core motif of MYB binding site                                              |
| -213 to -207 bp         | SEF3MOTIFGM                     | SEF3 binding site found in the 5' upstream region of beta-conglycinin       |

Online software analysis by PLACE (<http://www.dna.affrc.go.jp/PLACE/>).

**Table S2.** Primers for qRT-PCR.

| Gene            | Forward primer (5'-3')    | Reverse primer (5'-3')   |
|-----------------|---------------------------|--------------------------|
| <i>OsWRKY24</i> | GAATCTCAAAGACATGACACGACGG | CATCTGCATTCCTGGGCCCTC    |
| <i>OsCAT2</i>   | AGGAGGCAGAAGGCGACGATACA   | TCTTCACATGCTTGGCTTCACGTT |
| <i>OsJAZ9</i>   | GGCCGGTCGAGTTGGAA         | GGTCAGGCTCGGCGAAAT       |
| <i>OsRR6</i>    | GTCCCCAACGTCAACATGATC     | CACGTTCTCCGACGACATGAT    |
