# Supplementary material for: Transcriptome Analysis Revealed the Dynamic and Rapid Transcriptional Reprogramming Involved in Cold Stress and Related Core Genes in the Rice Seedling Stage
Source: Int J Mol Sci. 2023 Jan 18;24(3):1914. doi: 10.3390/ijms24031914 (PMC9916315; doi:10.3390/ijms24031914)
Supplement: Supplementary file 1 [file ijms-24-01914-s001.zip › supplement data file.xlsx]

## Sheet: 271 DEGs
	Gene_ID	T_0h	T_3h	T_12h	Z_0h	Z_3h	Z_12h	Annotation
1	LOC_Os01g60830	116.032	1492.72	619.9	122.606	847.004	411.393	expressed protein
2	LOC_Os04g17100	325.177	2029.82	2190.39	297.179	1796.14	2163.83	heavy metal-associated domain containing protein, expressed
3	LOC_Os07g32570	11.9546	112.439	41.9831	10.5031	76.6695	32.5051	OsAPRL1 adenosine 5'-phosphosulfate reductase-like OsAPRL1, expressed
4	LOC_Os02g45520	6.49271	66.7525	48.9785	5.15078	62.3407	27.6465	uncharacterized membrane protein, putative, expressed
5	LOC_Os08g06010	16.1306	137.467	89.6868	18.5671	112.379	78.8348	transporter, major facilitator family, putative, expressed
6	LOC_Os01g62430	28.8503	280.066	134.367	17.0724	440.551	74.6178	C2 domain containing protein, putative, expressed
7	LOC_Os05g41900	262.808	1223.07	1106.76	281.3	1196.69	875.48	translation initiation factor SUI1, putative, expressed
8	LOC_Os03g55776	180.849	1007.73	607.461	235.096	1029.25	456.063	expressed protein
9	LOC_Os01g63210	252.832	1128.73	549.994	210.157	823.617	405.472	SOUL heme-binding protein, putative, expressed
10	LOC_Os04g57550	16.9814	111.554	207.041	21.5389	123.958	145.127	amine oxidase, flavin-containing, domain containing protein, expressed
11	LOC_Os06g11290	15.0894	127.713	101.783	14.7296	93.1853	86.9241	12-oxophytodienoate reductase, putative, expressed
12	LOC_Os04g52090	26.0452	206.853	106.564	37.8282	228.707	89.3497	AP2 domain containing protein, expressed
13	LOC_Os05g50550	36.5784	189.452	239.189	26.4896	116.216	175.228	polyprenyl synthetase, putative, expressed
14	LOC_Os03g13810	115.747	496.822	508.082	137.637	574.687	461.06	expressed protein
15	LOC_Os03g08330	36.6089	289.523	103.546	44.6921	391.83	104.106	ZIM domain containing protein, putative, expressed
16	LOC_Os10g41930	14.48	128.538	95.5782	10.7276	83.0369	64.2024	haloacid dehalogenase-like hydrolase family protein, putative, expressed
17	LOC_Os06g45820	137.214	495.02	404.835	107.117	324.275	318.409	OsFtsH2 FtsH protease, homologue of AtFtsH2/8, expressed
18	LOC_Os03g60080	167.628	772.542	459.342	172.963	867.108	523.81	NAC domain-containing protein 67, putative, expressed
19	LOC_Os01g64470	24.3453	229.463	161.082	36.9626	424.201	284.675	harpin-induced protein 1 domain containing protein, expressed
20	LOC_Os02g47470	6.14609	60.8336	24.3062	13.0808	75.518	33.2862	cytochrome P450, putative, expressed
21	LOC_Os02g03280	27.8547	121.231	142.387	24.0015	154.773	141.149	transmembrane BAX inhibitor motif-containing protein, putative, expressed
22	LOC_Os01g72530	34.9429	263.417	264.49	32.9513	303.727	197.613	OsCML31 - Calmodulin-related calcium sensor protein, expressed
23	LOC_Os09g17152	10.6865	124.821	65.2875	12.2208	171.866	55.1492	OsFBX319 - F-box domain containing protein, expressed
24	LOC_Os04g41960	131.177	548.551	618.332	126.35	699.625	422.12	NADP-dependent oxidoreductase, putative, expressed
25	LOC_Os01g21250	1572.64	6981.28	8793.81	1603.68	9071.25	5327.76	late embryogenesis abundant protein, putative, expressed
26	LOC_Os03g40540	0.975016	25.9267	11.2758	2.60754	18.2909	16.3244	cytochrome P450, putative, expressed
27	LOC_Os03g50280	3.57563	51.1338	61.6938	3.48816	58.7814	55.5082	GLTP domain containing protein, putative, expressed
28	LOC_Os09g31200	136.229	601.742	562.106	162.675	720.442	544.327	AN1-like zinc finger domain containing protein, expressed
29	LOC_Os02g04510	6.4652	55.8837	34.5856	7.68487	57.7313	32.8407	UOS1, putative, expressed
30	LOC_Os03g23010	178.198	577.565	352.481	139.634	703.903	414.966	expressed protein
31	LOC_Os11g10470	263.312	1120.2	1182.36	218.084	1586.35	930.336	expressed protein
32	LOC_Os04g53620	115.738	340.759	271.571	109.694	386.352	225.564	ubiquitin family protein, putative, expressed
33	LOC_Os01g09220	9.64591	121.14	72.796	16.4655	245.291	74.2638	transposon protein, putative, CACTA, En/Spm sub-class, expressed
34	LOC_Os01g19130	51.8087	195.063	169.291	46.9624	174.318	119.141	protein phosphatase 2C, putative, expressed
35	LOC_Os04g58710	135.202	464.425	514.161	106.602	357.934	392.854	AMP-binding domain containing protein, expressed
36	LOC_Os02g44230	3.43144	2.47792	2.31442	5.52767	3.60634	2.87593	CPuORF22 - conserved peptide uORF-containing transcript, expressed
37	LOC_Os05g03760	27.1299	121.281	61.1201	38.8783	168.379	72.9183	zinc finger family protein, putative, expressed
38	LOC_Os03g53020	10.6466	76.5528	33.4621	12.1558	129.712	45.1666	helix-loop-helix DNA-binding domain containing protein, expressed
39	LOC_Os02g44870	254.177	762.054	866.922	295.314	803.25	728.615	dehydrin, putative, expressed
40	LOC_Os09g30490	11.2107	130.318	350.537	17.9267	205.517	242.874	EF hand family protein, expressed
41	LOC_Os03g45280	463.683	1194.55	2166.28	380.052	1285.44	2159.49	dehydrin, putative, expressed
42	LOC_Os11g08210	11.5685	59.3047	91.6741	32.4142	65.3384	94.0968	no apical meristem protein, putative, expressed
43	LOC_Os04g30420	1.93936	26.0425	13.5094	3.14934	28.4902	25.432	dehydrogenase, putative, expressed
44	LOC_Os01g51920	17.39	75.8429	72.3821	21.0584	128.278	59.2993	phosphotransferase, putative, expressed
45	LOC_Os07g49114	205.756	589.521	1043.12	228.25	660.361	739.588	wound-induced protein WI12, putative, expressed
46	LOC_Os01g72900	25.5529	212.605	1154.34	14.8386	257.608	638.561	abscisic stress-ripening, putative, expressed
47	LOC_Os08g08850	9.11947	97.7206	43.4872	4.91851	54.0854	23.7861	carotenoid synthesis regulator CarF, putative, expressed
48	LOC_Os03g27019	10.5253	41.482	87.5745	8.73659	33.2378	75.9791	expressed protein
49	LOC_Os01g62810	1.07261	13.6518	10.8667	1.22002	8.97942	9.18522	regulator of chromosome condensation, putative, expressed
50	LOC_Os06g04230	117.007	688.886	401.377	178.274	874.821	327.785	expressed protein
51	LOC_Os01g07530	9.09151	41.9634	20.9869	16.5583	45.6784	34.7824	uncharacterized glycosyltransferase, putative, expressed
52	LOC_Os04g46960	288.746	720.713	719.955	236.147	686.501	554.041	glutathione peroxidase domain containing protein, expressed
53	LOC_Os05g49770	6.28807	28.9261	34.9471	7.05819	22.999	21.5718	CTP synthase, putative, expressed
54	LOC_Os09g25460	5.255	28.0519	28.0129	12.2271	28.389	28.7957	transferase family protein, putative, expressed
55	LOC_Os02g41510	1.50523	79.0209	39.3325	3.0873	109.742	29.0506	MYB family transcription factor, putative, expressed
56	LOC_Os06g51360	21.9811	82.9759	43.0213	13.9159	72.339	27.5757	lysM domain containing protein, putative, expressed
57	LOC_Os04g45090	15.462	64.6871	68.4334	15.3479	64.8766	78.4232	cytochrome b561, putative, expressed
58	LOC_Os08g15050	2.51242	52.7183	14.2709	4.25379	61.3836	21.7261	CCT/B-box zinc finger protein, putative, expressed
59	LOC_Os04g54310	78.772	8.89665	7.35492	91.5172	8.47666	12.5999	expressed protein
60	LOC_Os03g60639	481.797	113.297	57.0179	431.646	104.251	45.6642	expressed protein
61	LOC_Os01g31360	3.64669	19.3897	36.0152	2.44203	20.4525	34.0071	expressed protein
62	LOC_Os11g16580	7.8926	34.7909	34.1392	9.41527	24.3646	31.9493	endonuclease III-like protein 1, putative, expressed
63	LOC_Os03g14370	23.0905	85.8158	101.505	30.1804	130.553	70.3533	ACT domain containing protein, expressed
64	LOC_Os02g52010	16.9736	108.129	146.357	26.552	110.366	100.649	phosphate-induced protein 1 conserved region domain containing protein, expressed
65	LOC_Os03g20380	21.6203	73.3869	44.0608	14.2359	54.6489	32.8731	CAMK_KIN1/SNF1/Nim1_like.2 - CAMK includes calcium/calmodulin depedent protein kinases, expressed
66	LOC_Os02g50374	8.84085	109.376	64.7118	11.0529	143.9	57.0637	expressed protein
67	LOC_Os01g50100	14.8232	51.3926	44.1293	7.67201	71.6151	25.4378	ABC transporter, ATP-binding protein, putative, expressed
68	LOC_Os04g59440	10.7144	122.137	155.636	8.83291	121.9	223.969	chlorophyll A-B binding protein, putative, expressed
69	LOC_Os08g04340	34.1203	194.525	159.216	22.1953	327.564	70.1584	plastocyanin-like domain containing protein, putative, expressed
70	LOC_Os07g48100	53.1957	160.133	205.812	52.166	127.567	145.798	CAMK_KIN1/SNF1/Nim1_like.31 - CAMK includes calcium/calmodulin depedent protein kinases, expressed
71	LOC_Os01g29330	8.4688	76.5665	62.2597	8.03553	103.695	62.8444	expressed protein
72	LOC_Os01g72360	2.96315	2.00932	1.96112	2.07728	2.84963	1.43692	expressed protein
73	LOC_Os08g37660	85.3337	346.045	308.278	78.1658	451.514	298.529	plastocyanin-like domain containing protein, putative, expressed
74	LOC_Os04g57200	87.8152	334.23	348.968	129.31	376.081	377.62	heavy metal transport/detoxification protein, putative, expressed
75	LOC_Os02g37930	35.9767	103.627	170.04	36.5466	105.516	133.827	hypoxia-responsive family protein, putative, expressed
76	LOC_Os01g72370	0.974705	12.0476	7.18857	0.91428	18.2687	7.34383	helix-loop-helix DNA-binding domain containing protein, expressed
77	LOC_Os09g37330	133.488	19.1148	32.7827	153.742	12.5316	26.1859	OsSAUR39 - Auxin-responsive SAUR gene family member, expressed
78	LOC_Os01g42380	7.8118	31.9427	42.0781	5.02955	49.5381	13.5906	pleiotropic drug resistance protein, putative, expressed
79	LOC_Os10g43060	37.6007	115.283	78.1461	27.8682	161.613	53.8461	expressed protein
80	LOC_Os02g39790	58.12	154.935	189.67	51.1103	145.241	137.799	CPuORF9 - conserved peptide uORF-containing transcript, expressed
81	LOC_Os03g37830	6.8051	23.2302	39.3626	5.0301	24.8889	19.2277	potassium transporter, putative, expressed
82	LOC_Os11g01040	33.9085	106.621	78.5486	28.8214	103.671	67.9393	monoglyceride lipase, putative, expressed
83	LOC_Os01g43370	27.118	69.3757	77.4941	21.5845	49.6925	60.5409	CPuORF17 - conserved peptide uORF-containing transcript, expressed
84	LOC_Os01g51670	139.467	444.437	264.666	67.1047	535.468	221.409	expressed protein
85	LOC_Os09g35010	8.06653	72.8728	39.0035	11.3717	102.811	30.3735	dehydration-responsive element-binding protein, putative, expressed
86	LOC_Os03g01740	154.285	405.953	318.978	162.376	444.466	373.456	expressed protein
87	LOC_Os02g50110	130.063	517.005	562.623	124.796	592.8	343.253	expressed protein
88	LOC_Os03g02514	5.05945	20.4441	14.4147	5.56867	27.6647	11.7973	hydrolase, alpha/beta fold family protein, putative, expressed
89	LOC_Os02g11859	34.3095	173.69	95.4787	29.2668	252.208	78.158	expressed protein
90	LOC_Os04g43440	2.30507	15.6116	9.78618	1.40176	26.1026	6.01416	NB-ARC/LRR disease resistance protein, putative, expressed
91	LOC_Os04g38914	306.538	79.2429	46.5028	273.184	79.9352	66.2776	expressed protein
92	LOC_Os07g17330	228.128	569.273	656.342	168.107	674.522	386.927	B12D protein, putative, expressed
93	LOC_Os03g07360	48.3771	126.824	126.196	42.6615	92.7078	102.25	expressed protein
94	LOC_Os04g49510	8.59034	26.3466	26.5999	13.0721	30.7788	40.3811	CAMK_CAMK_like.27 - CAMK includes calcium/calmodulin depedent protein kinases, expressed
95	LOC_Os04g27250	73.9204	22.1562	12.6575	75.39	26.4362	12.341	expressed protein
96	LOC_Os01g66860	1.79708	17.7661	20.1873	1.89278	29.4673	18.0358	serine/threonine protein kinase, putative, expressed
97	LOC_Os01g58140	12.286	78.0868	39.9024	11.5161	67.654	37.3454	expressed protein
98	LOC_Os05g39720	0.544088	15.9263	7.4931	0.558653	27.4872	7.62173	WRKY70, expressed
99	LOC_Os07g37320	38.4938	117.559	143.169	34.122	202.765	141.012	transporter family protein, putative, expressed
100	LOC_Os07g37550	95.0574	291.306	599.408	54.4499	181.19	658.452	chlorophyll A-B binding protein, putative, expressed
101	LOC_Os06g51029	24.1918	52.5339	61.0608	27.7551	49.8924	55.3559	OsFtsH1 FtsH protease, homologue of AtFtsH1/5, expressed
102	LOC_Os11g02290	19.9902	94.3711	230.396	25.9587	110.937	148.904	expressed protein
103	LOC_Os01g40860	3.75338	13.3702	23.5729	2.73343	13.319	21.9251	aldehyde dehydrogenase, putative, expressed
104	LOC_Os03g08320	28.3676	98.4122	65.8142	22.3984	145.51	63.1008	ZIM domain containing protein, putative, expressed
105	LOC_Os03g55070	30.8461	79.7736	92.1344	29.2674	95.9706	61.919	UDP-glucose 6-dehydrogenase, putative, expressed
106	LOC_Os01g74040	27.8749	96.4629	54.1556	22.1535	136.329	51.0956	zinc finger, RING-type, putative, expressed
107	LOC_Os05g27730	12.7363	43.7124	30.7141	15.5297	54.8559	33.1882	WRKY53, expressed
108	LOC_Os01g68020	7.79833	27.3284	53.4104	10.0005	24.8889	86.0906	BTBZ2 - Bric-a-Brac, Tramtrack, and Broad Complex BTB domain with TAZ zinc finger and Calmodulin-binding domains, expressed
109	LOC_Os03g18150	10.7007	40.4392	36.7537	12.8794	46.0539	29.7678	protein phosphatase 2C, putative, expressed
110	LOC_Os06g04070	73.7436	167.431	215.735	89.1691	158.144	182.38	pyridoxal-dependent decarboxylase protein, putative, expressed
111	LOC_Os05g51130	4.93709	26.5596	34.2799	3.9693	27.9412	25.5953	mitochondrial chaperone BCS1, putative, expressed
112	LOC_Os01g66120	36.4993	95.5753	136.978	68.6006	133.709	213.62	No apical meristem protein, putative, expressed
113	LOC_Os02g36530	98.1564	466.6	243.535	64.3386	628.647	196.523	expressed protein
114	LOC_Os02g39795	30.3632	74.7901	89.4331	31.4729	70.0896	67.824	S-adenosyl-l-methionine decarboxylase leader peptide, putative, expressed
115	LOC_Os02g11070	3.57769	19.2523	11.0952	2.17847	35.5408	9.35386	3-ketoacyl-CoA synthase, putative, expressed
116	LOC_Os01g03130	16.7752	73.2607	120.845	19.2438	61.9809	92.3014	expressed protein
117	LOC_Os05g11260	103.007	40.0152	21.385	87.1648	36.7712	19.8711	expressed protein
118	LOC_Os01g43870	34.4859	72.8747	65.0495	25.3831	71.7312	51.2966	NLI interacting factor-like phosphatase, putative, expressed
119	LOC_Os07g12340	8.88831	47.9564	43.8091	6.16507	53.8519	39.2015	NAC domain-containing protein 67, putative, expressed
120	LOC_Os02g37654	12.3243	3.26895	2.76515	13.048	4.33905	4.4061	lecithin:cholesterol acyltransferase, putative, expressed
121	LOC_Os03g09170	0.371403	30.271	18.8367	1.2032	27.571	20.2762	ethylene-responsive transcription factor, putative, expressed
122	LOC_Os02g14840	1.12674	9.59751	4.58848	0.814991	9.06275	3.87717	potassium channel KAT1, putative, expressed
123	LOC_Os03g52910	0.919481	19.78	16.5047	0.728842	37.6941	8.20591	uncharacterized UPF0114 domain containing protein, expressed
124	LOC_Os11g44870	97.1806	31.0188	32.5814	66.9596	24.8276	20.5789	expressed protein
125	LOC_Os01g55240	1.2255	13.7879	24.0865	1.54687	11.9256	21.4182	gibberellin 2-beta-dioxygenase, putative, expressed
126	LOC_Os02g52860	59.4973	116.901	176.668	59.2322	105.943	141.348	phosphate carrier protein, mitochondrial precursor, putative, expressed
127	LOC_Os07g23810	20.7283	2.99878	3.32711	12.7986	2.89748	1.88066	expressed protein
128	LOC_Os01g74370	5.80494	30.6899	50.2391	4.16389	43.9307	40.2003	domain of unknown function DUF966 domain containing protein, expressed
129	LOC_Os07g36170	10.0298	25.9147	30.3267	8.97076	32.2628	26.01	chitin-inducible gibberellin-responsive protein, putative, expressed
130	LOC_Os12g24020	165.295	44.299	71.0974	489.254	52.1881	119.298	rhodanese-like domain containing protein, putative, expressed
131	LOC_Os08g33540	20.0063	53.6749	67.6612	16.3738	38.1873	59.6043	ATP-dependent Clp protease adaptor protein ClpS containing protein, expressed
132	LOC_Os03g25750	2.76586	8.78558	7.7631	1.88813	8.98484	4.49271	SNARE associated Golgi protein, putative, expressed
133	LOC_Os04g58890	7.45059	38.441	41.2332	8.10624	56.0311	33.6328	expressed protein
134	LOC_Os02g51350	8.20844	25.7383	27.5664	13.7091	41.473	47.4734	OsFBK10 - F-box domain and kelch repeat containing protein, expressed
135	LOC_Os05g02760	12.6677	40.1064	61.066	9.27728	38.7831	32.842	expressed protein
136	LOC_Os01g45914	1	25.2224	17.3319	1	33.1275	25.8539	expressed protein
137	LOC_Os09g27050	4.41596	17.4567	12.408	3.27189	18.1883	11.7603	HD domain containing protein, putative, expressed
138	LOC_Os01g61080	1.92867	13.5857	7.34087	2.06761	28.847	9.39369	WRKY24, expressed
139	LOC_Os07g01020	90.1559	242.521	358.716	125.236	291.09	343.881	SOR/SNZ family protein, putative, expressed
140	LOC_Os03g20370	291.839	580.454	600.995	215.184	626.907	467.014	OsCam1-1 - Calmodulin, expressed
141	LOC_Os02g03410	7.14094	19.4089	15.1583	5.30989	21.001	14.4185	CAMK_CAMK_like.12 - CAMK includes calcium/calmodulin depedent protein kinases, expressed
142	LOC_Os01g47580	0.758868	8.44923	35.7037	0.822583	8.20892	20.817	lipid phosphatase protein, putative, expressed
143	LOC_Os10g27274	16.7721	3.20948	3.88681	14.467	3.07862	2.03818	expressed protein
144	LOC_Os05g37190	1.0227	11.4912	8.66525	2.6531	19.3823	11.2969	ZOS5-08 - C2H2 zinc finger protein, expressed
145	LOC_Os04g52260	38.6981	105.519	521.562	40.8691	88.4452	765.78	LTPL124 - Protease inhibitor/seed storage/LTP family protein precursor, expressed
146	LOC_Os01g17396	0.219677	8.73816	8.09781	0.82754	10.9034	10.1368	expressed protein
147	LOC_Os01g52230	10.3696	62.8289	81.7693	10.4182	110.576	70.0996	phosphoethanolamine/phosphocholine phosphatase, putative, expressed
148	LOC_Os04g46970	1.66552	8.83694	7.95845	0.889335	16.6848	11.574	glucosyltransferase, putative, expressed
149	LOC_Os01g71190	141.055	318.136	367.97	100.846	249.569	306.039	photosystem II reaction center PSB28 protein, chloroplast precursor, putative, expressed
150	LOC_Os09g28440	1	18.4685	17.62	1.48463	45.6859	16.1948	AP2 domain containing protein, expressed
151	LOC_Os04g55650	99.2771	216.344	190.088	104.98	192.148	194.285	oryzain alpha chain precursor, putative, expressed
152	LOC_Os02g53130	1	4.77285	3.35659	0.375619	3.72822	3.81062	nitrate reductase, putative, expressed
153	LOC_Os02g39080	28.4073	5.25434	3.79953	32.9319	4.51136	3.37742	expressed protein
154	LOC_Os03g18264	27.7184	9.41133	4.22201	25.7237	8.16845	3.33958	expressed protein
155	LOC_Os10g36703	11.4425	47.4353	56.9322	6.45062	48.535	40.1468	CPuORF40 - conserved peptide uORF-containing transcript, expressed
156	LOC_Os04g34600	14.0966	51.9717	241.228	11.8078	84.996	149.877	abscisic stress-ripening, putative, expressed
157	LOC_Os10g33190	59.265	20.3256	11.8865	76.8489	16.8359	9.83769	expressed protein
158	LOC_Os04g31870	273.049	57.6089	31.4956	271.211	51.8564	79.0759	expressed protein
159	LOC_Os03g60560	13.3247	77.5912	150.975	19.9755	148.02	139.466	ZOS3-21 - C2H2 zinc finger protein, expressed
160	LOC_Os03g18070	36.93	75.0212	72.3534	32.698	99.832	63.7267	omega-3 fatty acid desaturase, chloroplast precursor, putative, expressed
161	LOC_Os04g29550	66.8499	12.023	7.697	55.2515	11.7555	13.2606	RIPER2 - Ripening-related family protein precursor, expressed
162	LOC_Os11g05380	2.1286	54.347	20.9769	4.71705	94.6017	26.1211	cytochrome P450, putative, expressed
163	LOC_Os03g11900	32.2292	71.6716	73.1104	23.3601	102.058	47.0269	transporter family protein, putative, expressed
164	LOC_Os03g05750	1.66727	14.1258	13.2255	3.62034	25.6494	21.7202	heavy-metal-associated domain-containing protein, putative, expressed
165	LOC_Os07g47670	16.0226	50.1912	61.5768	14.0619	33.5377	40.805	hypoxia-responsive family protein, putative, expressed
166	LOC_Os01g66350	12.566	28.0154	34.5241	10.1586	22.4466	22.8094	DUF647 domain containing protein, putative, expressed
167	LOC_Os10g42690	8.47994	19.3555	21.7778	7.27832	22.6133	17.5851	jmjC domain containing protein, expressed
168	LOC_Os02g47620	11.3638	32.2857	38.4116	14.1995	30.3368	37.1402	hydrolase, alpha/beta fold family domain containing protein, expressed
169	LOC_Os02g32814	3.00983	7.23807	16.1173	3.19431	8.53927	15.6713	heavy metal-associated domain containing protein, expressed
170	LOC_Os06g04240	26.1524	256.671	146.928	23.3638	346.159	102.878	expressed protein
171	LOC_Os03g45730	15.3772	44.3796	56.9846	27.1969	73.6585	65.2089	DNA-binding protein-like, putative, expressed
172	LOC_Os11g03580	0.429909	21.1473	155.43	0.868467	13.111	126.173	expressed protein
173	LOC_Os01g46970	1.50526	6.85505	4.78379	0.982196	5.10565	3.80165	transcription factor, putative, expressed
174	LOC_Os02g50600	24.7463	66.7284	82.458	16.549	87.3018	55.5812	glycosyl transferase 8 domain containing protein, putative, expressed
175	LOC_Os10g40550	0.649178	6.09007	4.60369	0.899063	6.85302	4.7284	CPuORF23 - conserved peptide uORF-containing transcript, expressed
176	LOC_Os01g72910	12.7624	57.4092	360.273	9.11591	72.374	229.576	abscisic stress-ripening, putative, expressed
177	LOC_Os02g55560	7.29923	20.1468	16.9355	5.30567	21.8102	15.7662	protein phosphatase 2C, putative, expressed
178	LOC_Os10g42410	32.0357	67.1964	82.8804	24.396	73.8612	72.6682	zinc-binding protein, putative, expressed
179	LOC_Os12g12260	2.91836	11.3384	9.71471	2.87215	13.41	8.81982	diacylglycerol kinase 1, putative, expressed
180	LOC_Os06g05470	56.2542	145.886	249.55	54.4814	198.557	173.885	expressed protein
181	LOC_Os11g09010	1.87078	7.90827	5.92359	1.94855	8.00814	6.20569	lipase, putative, expressed
182	LOC_Os12g33150	23.588	64.5294	48.8814	14.8295	163.946	35.7512	expressed protein
183	LOC_Os05g27080	5.41484	12.0928	21.2069	4.38678	18.3647	10.5451	retrotransposon protein, putative, unclassified, expressed
184	LOC_Os03g13820	2.22319	7.64839	7.47855	2.78401	10.4924	6.68959	protein kinase family protein, putative, expressed
185	LOC_Os08g04350	8.94935	43.9629	39.5144	5.67136	78.797	25.8479	plastocyanin-like domain containing protein, putative, expressed
186	LOC_Os01g67530	1.4619	7.63484	6.02132	2.35242	6.89636	7.65968	AMP-binding enzyme, putative, expressed
187	LOC_Os05g06399	26.0469	8.12371	3.75226	44.5544	7.45045	5.10504	expressed protein
188	LOC_Os01g31370	1.03688	10.2306	8.66866	0.645889	13.5349	9.46699	glycosyltransferase, putative, expressed
189	LOC_Os03g39610	60.9516	129.316	534.323	36.9996	131.359	986.307	chlorophyll A-B binding protein, putative, expressed
190	LOC_Os11g47460	28.0625	4.87591	3.2485	33.8104	5.3858	4.10293	MYB family transcription factor, putative, expressed
191	LOC_Os06g21580	9.60191	28.5527	25.4521	10.3147	29.9696	24.6783	expressed protein
192	LOC_Os06g10210	5.56339	14.9696	12.2896	3.13346	21.4651	8.54398	expressed protein
193	LOC_Os03g10640	5.23928	13.4675	17.6802	4.86446	21.9239	12.6697	calcium-transporting ATPase, plasma membrane-type, putative, expressed
194	LOC_Os05g34914	29.3826	10.052	7.76588	27.4073	10.0539	7.17485	expressed protein
195	LOC_Os05g48870	4.03944	12.121	11.2911	5.40735	15.0856	11.2427	auxin response factor 15, putative, expressed
196	LOC_Os05g41610	5.01093	16.6196	43.4004	11.1693	27.2191	42.3726	glycosyl hydrolases family 17, putative, expressed
197	LOC_Os02g10390	112.869	225.393	504.002	53.9604	176.573	623.703	chlorophyll A-B binding protein, putative, expressed
198	LOC_Os01g50610	2.22653	10.5444	7.71235	1.19743	5.05043	6.59798	SAM dependent carboxyl methyltransferase, putative, expressed
199	LOC_Os04g43650	23.9536	44.1307	49.5011	23.33	46.7873	48.731	L-allo-threonine aldolase, putative, expressed
200	LOC_Os10g40640	4.96988	15.1559	14.2753	3.54762	23.2505	10.0772	glycosyl transferase 8 domain containing protein, putative, expressed
201	LOC_Os01g60020	3.67644	17.1683	15.9636	3.0945	25.9748	21.2832	NAC domain transcription factor, putative, expressed
202	LOC_Os12g09584	23.5807	6.41674	5.13993	22.5829	5.3771	4.70937	expressed protein
203	LOC_Os07g48570	6.87639	17.0452	24.0292	6.4685	14.4789	24.5042	expressed protein
204	LOC_Os04g50700	20.0607	52.6358	58.5963	7.85165	36.9173	46.0797	pathogenesis-related Bet v I family protein, putative, expressed
205	LOC_Os12g05260	22.1954	54.9514	138.878	21.0794	60.2419	83.6149	phytosulfokines precursor, putative, expressed
206	LOC_Os09g27820	8.56587	29.4737	47.6113	14.353	32.5075	41.1806	1-aminocyclopropane-1-carboxylate oxidase protein, putative, expressed
207	LOC_Os07g06644	49.7141	21.1096	21.3537	46.6561	16.9763	20.919	expressed protein
208	LOC_Os02g41680	10.4555	28.1698	22.2269	6.42456	52.3623	21.0474	phenylalanine ammonia-lyase, putative, expressed
209	LOC_Os07g42960	16.8368	34.1367	55.3434	25.9035	59.6199	65.4863	phospho-2-dehydro-3-deoxyheptonate aldolase, chloroplast precursor, putative, expressed
210	LOC_Os05g04360	7.74784	19.6259	23.106	9.63706	20.7683	22.413	protein phosphatase 2C, putative, expressed
211	LOC_Os01g73890	8.78974	23.9674	78.2872	8.8918	22.5556	56.7387	transcription initiation factor IIA gamma chain, putative, expressed
212	LOC_Os04g55800	16.3098	5.91638	5.59545	10.6006	4.01063	3.68466	sulfate transporter, putative, expressed
213	LOC_Os04g54200	2.78072	8.33762	18.3531	2.49142	14.3851	12.8524	diacylglycerol kinase, putative, expressed
214	LOC_Os01g64960	115.461	248.593	545.817	82.6469	320.877	539.214	chlorophyll A-B binding protein, putative, expressed
215	LOC_Os01g62760	6.87998	21.5645	39.3618	6.59352	24.5939	40.2486	protein phosphatase 2C, putative, expressed
216	LOC_Os12g12390	34.8585	9.47196	9.65896	47.6985	12.3672	10.1137	transposon protein, putative, CACTA, En/Spm sub-class, expressed
217	LOC_Os02g18450	9.1317	18.9141	24.8268	10.6098	23.9342	43.9068	GTP-binding protein typA/bipA, putative, expressed
218	LOC_Os08g42800	19.401	97.3539	109.735	9.78582	126.664	87.9956	expressed protein
219	LOC_Os12g41710	19.4584	6.78006	7.02338	30.5939	6.34009	9.2529	Protein kinase domain containing protein, expressed
220	LOC_Os09g04290	16.1644	2.83035	2.24049	13.9427	2.46908	3.82806	expressed protein
221	LOC_Os02g27594	25.4143	8.96285	7.0081	27.119	9.38177	11.1908	expressed protein
222	LOC_Os02g53140	4.8739	11.2887	11.2802	7.55948	14.3845	18.5696	COP1, putative, expressed
223	LOC_Os02g39330	13.8298	115.401	172.294	11.2206	225.958	128.296	CHIT1 - Chitinase family protein precursor, expressed
224	LOC_Os12g36430	53.7094	17.7907	20.4706	120.869	4.59563	26.7643	expressed protein
225	LOC_Os01g55500	0.191304	3.42637	2.10713	0.162594	4.43424	2.23596	nucleobase-ascorbate transporter, putative, expressed
226	LOC_Os05g51160	78.0832	32.858	11.9517	93.9629	31.2797	18.057	Myb transcription factor, putative, expressed
227	LOC_Os03g20550	37.3925	74.896	98.4565	26.4373	56.1351	65.9287	WRKY55, expressed
228	LOC_Os07g03040	2.20809	6.43225	10.3839	1.01742	9.62375	5.47106	expressed protein
229	LOC_Os06g51260	45.3523	19.4867	18.4672	38.2749	16.6528	15.5167	MYB family transcription factor, putative, expressed
230	LOC_Os07g39680	441.403	818.539	1564.75	467.609	1003.07	1313.94	UV-induced protein uvi15, putative, expressed
231	LOC_Os05g46340	10.4839	32.0217	36.6852	8.59951	41.4622	33.2073	expressed protein
232	LOC_Os02g15230	27.8186	51.0871	56.9743	28.9439	74.1708	61.58	GDSL-like lipase/acylhydrolase, putative, expressed
233	LOC_Os06g04220	15.209	155.963	84.4359	13.0057	354.401	75.4552	expressed protein
234	LOC_Os09g17740	34.6064	164.684	1947.37	22.1962	199.727	1914.69	chlorophyll A-B binding protein, putative, expressed
235	LOC_Os05g10620	4.55448	9.98433	31.0784	3.44055	8.19109	15.9855	no apical meristem protein, putative, expressed
236	LOC_Os07g08160	1	7.054	16.1667	1	14.8832	15.6031	early light-induced protein, chloroplast precursor, putative, expressed
237	LOC_Os05g16420	84.8417	25.9591	17.2969	113.785	28.0595	17.3636	SHR5-receptor-like kinase, putative, expressed
238	LOC_Os03g16170	1.53932	8.82464	10.6533	2.73569	14.007	11.6435	protein phosphatase 2C, putative, expressed
239	LOC_Os08g43670	4.36509	14.6841	14.0809	7.25758	26.1249	18.4878	RING-H2 finger protein ATL2B, putative, expressed
240	LOC_Os03g64219	30.0642	12.7215	9.2076	27.2566	11.3096	7.2315	OTU-like cysteine protease family protein, putative, expressed
241	LOC_Os03g20120	2.68296	11.9284	31.7994	6.0702	34.58	49.0185	glycosyl transferase 8 domain containing protein, putative, expressed
242	LOC_Os10g28240	0.115791	2.79486	6.46214	0.375207	3.77793	6.70932	calcium-transporting ATPase, plasma membrane-type, putative, expressed
243	LOC_Os06g50130	77.5767	32.4309	22.5341	78.5874	33.9764	31.7691	expressed protein
244	LOC_Os01g59930	8.76543	17.8765	21.3941	8.6829	15.3889	21.5519	NADH-cytochrome b5 reductase, putative, expressed
245	LOC_Os07g09420	2.10555	9.63461	18.5201	3.32114	13.1772	37.0193	ATPase, putative, expressed
246	LOC_Os08g10080	15.5742	5.71697	1.73311	16.2822	6.48819	2.15948	no apical meristem protein, putative, expressed
247	LOC_Os03g50960	5.46457	26.4136	119.231	10.5832	31.2746	198.938	LTPL118 - Protease inhibitor/seed storage/LTP family protein precursor, expressed
248	LOC_Os08g08592	13.2502	4.04361	3.00845	11.1157	3.05791	1.36958	expressed protein
249	LOC_Os02g37700	27.9419	8.83805	2.0802	25.8159	6.50981	4.24373	lecithin:cholesterol acyltransferase, putative, expressed
250	LOC_Os06g09980	3.77696	16.7095	18.0921	1.9925	16.0004	11.1232	expressed protein
251	LOC_Os05g31140	217.371	53.8475	61.9347	272.44	67.0264	91.2835	glycosyl hydrolases family 17, putative, expressed
252	LOC_Os02g56250	10.013	19.581	23.3914	11.5035	26.6745	22.6238	GATA zinc finger domain containing protein, expressed
253	LOC_Os11g07580	149.173	51.5048	47.1501	200.379	57.6863	44.6148	expressed protein
254	LOC_Os08g33720	12.7728	23.9322	75.831	9.70307	21.8496	47.1206	lactate/malate dehydrogenase, putative, expressed
255	LOC_Os04g24804	18.0615	7.8079	3.8361	35.5271	5.02859	4.22648	expressed protein
256	LOC_Os04g27190	5.66604	2.06696	1.0878	15.6261	3.11068	1.3993	terpene synthase, putative, expressed
257	LOC_Os02g49160	18.3651	5.42013	6.63171	22.0621	3.92837	7.17296	OsIAA8 - Auxin-responsive Aux/IAA gene family member, expressed
258	LOC_Os03g30519	25.691	10.7525	10.0547	28.5643	11.774	5.99902	expressed protein
259	LOC_Os05g33940	8.45182	19.3801	27.2699	9.08608	21.6748	21.2942	alpha/beta hydrolase fold, putative, expressed
260	LOC_Os09g19310	32.6727	11.3226	10.0588	36.2588	13.5773	12.3835	retrotransposon protein, putative, unclassified, expressed
261	LOC_Os03g08860	7.35523	17.425	24.3003	19.2196	35.0478	64.2595	GRAM domain containing protein, expressed
262	LOC_Os08g27170	1.43429	5.76428	25.9969	1.34874	8.22891	14.5462	calmodulin binding protein, putative, expressed
263	LOC_Os09g28390	3.04379	8.0683	14.7827	3.31119	12.8107	18.6456	cytochrome P450, putative, expressed
264	LOC_Os11g03820	3.34963	0.558737	0.592483	3.02742	0.572539	0.253723	D-mannose binding lectin family protein, expressed
265	LOC_Os04g33260	14.2877	6.16921	6.1976	16.8203	3.81983	5.82051	expressed protein
266	LOC_Os09g27010	1.05799	5.12819	18.1701	1.55643	7.07016	23.4435	tyrosine protein kinase domain containing protein, putative, expressed
267	LOC_Os03g19070	0.879651	8.39719	17.8515	2.07653	23.0948	27.322	long cell-linked locus protein, putative, expressed
268	LOC_Os04g46020	2.76356	6.60998	8.69555	2.50333	6.75936	7.73661	GATA zinc finger domain containing protein, expressed
269	LOC_Os01g69870	109.446	46.9369	39.631	200.545	63.7762	55.8414	expressed protein
270	LOC_Os12g22489	14.2011	5.29628	2.29825	38.3075	5.16135	4.479	expressed protein
271	LOC_Os05g22960	29.1616	13.1233	12.8332	65.4858	17.6243	16.1383	expressed protein

## Sheet: 40 DEGs
	Gene_ID	T_0h	T_3h	T_12h	Z_0h	Z_3h	Z_12h	Annotation
1	LOC_Os06g05420	49	253.333	180	4.33333	14.3333	265.5	expressed protein
2	LOC_Os10g40360	59.6667	177.333	206	151.667	565.667	157.5	proline oxidase, mitochondrial precursor, putative, expressed
3	LOC_Os04g43680	16	78	51	19.6667	217	51	MYB family transcription factor, putative, expressed
4	LOC_Os01g61080	4.33333	26.6667	16	5.66667	71.6667	15	WRKY24, expressed
5	LOC_Os03g08310	1	21.6667	6.33333	2.66667	63.3333	4.5	ZIM domain containing protein, putative, expressed
6	LOC_Os12g28590	6.66667	27.3333	12.6667	11.3333	160.333	9	ATPase 2, putative, expressed
7	LOC_Os01g64310	1.66667	17.6667	22.3333	9	52.6667	17.5	no apical meristem protein, putative, expressed
8	LOC_Os12g33150	24.6667	61.6667	52	19.3333	193.667	55	expressed protein
9	LOC_Os04g46990	2.66667	15.3333	19	10.6667	55.3333	23.5	cis-zeatin O-glucosyltransferase, putative, expressed
10	LOC_Os12g36430	155	48	65	443	16	99.5	expressed protein
11	LOC_Os09g27580	75.3333	27	35.6667	36	93.6667	41	potassium transporter, putative, expressed
12	LOC_Os03g20120	3.66667	15	44.3333	10.6667	55	70	glycosyl transferase 8 domain containing protein, putative, expressed
13	LOC_Os06g29730	44.6667	78.6667	60.6667	68.6667	267	92	RALFL28 - Rapid ALkalinization Factor RALF family protein precursor, expressed
14	LOC_Os09g17146	2.33333	11	12.6667	1.66667	39	6.5	expressed protein
15	LOC_Os07g34260	4	14.6667	5.66667	5.66667	65	4	chalcone and stilbene synthases, putative, expressed
16	LOC_Os03g37830	39	123	233	36	164.333	178.5	potassium transporter, putative, expressed
17	LOC_Os11g46810	319.333	155.333	65.6667	120	230.667	56.5	retrotransposon protein, putative, unclassified, expressed
18	LOC_Os05g10620	20	40	141	18.6667	41.3333	110	no apical meristem protein, putative, expressed
19	LOC_Os02g02400	13.6667	11.6667	136.667	24.6667	26	186	catalase isozyme A, putative, expressed
20	LOC_Os01g42380	43.6667	168.333	243.667	36	328.333	212	pleiotropic drug resistance protein, putative, expressed
21	LOC_Os05g27080	45.3333	89.6667	177.333	44.6667	171.333	142	retrotransposon protein, putative, unclassified, expressed
22	LOC_Os08g04340	27.6667	143.667	129.333	22.3333	307.667	105	plastocyanin-like domain containing protein, putative, expressed
23	LOC_Os06g49640	27.6667	35.6667	122.667	97	70.6667	221	uncharacterized UPF0114 domain containing protein, expressed
24	LOC_Os08g40160	4.66667	14	42.3333	15.3333	18.3333	77	thylakoid lumen protein, chloroplast precursor, putative, expressed
25	LOC_Os01g70240	16	13.3333	82	22	15.6667	168	expressed protein
26	LOC_Os04g57720	4.66667	9.66667	35.6667	19	27.6667	57.5	OsRR6 type-A response regulator, expressed
27	LOC_Os08g04450	6.33333	4.66667	35	14.6667	3	62.5	DAG protein, chloroplast precursor, putative, expressed
28	LOC_Os10g39100	116	55.3333	40	80.3333	66	31.5	uncharacterized Cys-rich domain containing protein, putative, expressed
29	LOC_Os07g41330	15.3333	20.6667	59.3333	46.6667	29.3333	112	mitochondrial import inner membrane translocase subunit Tim17, putative, expressed
30	LOC_Os03g08860	15	31	49.3333	47.6667	79.3333	80	GRAM domain containing protein, expressed
31	LOC_Os04g53170	2	3.66667	16	11.3333	5.33333	30	bromodomain containing protein, expressed
32	LOC_Os03g01910	60	59.3333	131.333	125.333	106	271.5	transcription factor BTF3, putative, expressed
33	LOC_Os12g35340	3.33333	2.66667	21	22.6667	9	50	OsGrx_C11 - glutaredoxin subgroup III, expressed
34	LOC_Os05g25920	7.33333	34.6667	29	25.6667	89.6667	53	expressed protein
35	LOC_Os07g46555	8.66667	11.3333	26.6667	30.3333	18.6667	55.5	F-box domain containing protein, expressed
36	LOC_Os01g54340	13	13	39	34.3333	26	89	plant-specific domain TIGR01615 family protein, expressed
37	LOC_Os06g08080	12.3333	5.66667	34.6667	25.3333	8.33333	51.5	inorganic H+ pyrophosphatase, putative, expressed
38	LOC_Os06g06880	5.66667	4.33333	19.3333	16	6.33333	43	Ser/Thr protein phosphatase family protein, putative, expressed
39	LOC_Os08g02700	1.66667	3.66667	11.3333	12.3333	3.66667	25	fructose-bisphospate aldolase isozyme, putative, expressed
40	LOC_Os03g13870	4.33333	8.33333	14.3333	15.3333	14	27	expressed protein
